# Supplementary material for: Swine T-Cells and Specific Antibodies Evoked by Peptide Dendrimers Displaying Different FMDV T-Cell Epitopes
Source: PubMed Central journal article supplement (PMC7886804; doi:10.3389/fimmu.2020.621537), 2021-02-03
Supplement: Image_1.pdf [file Image_1.pdf]

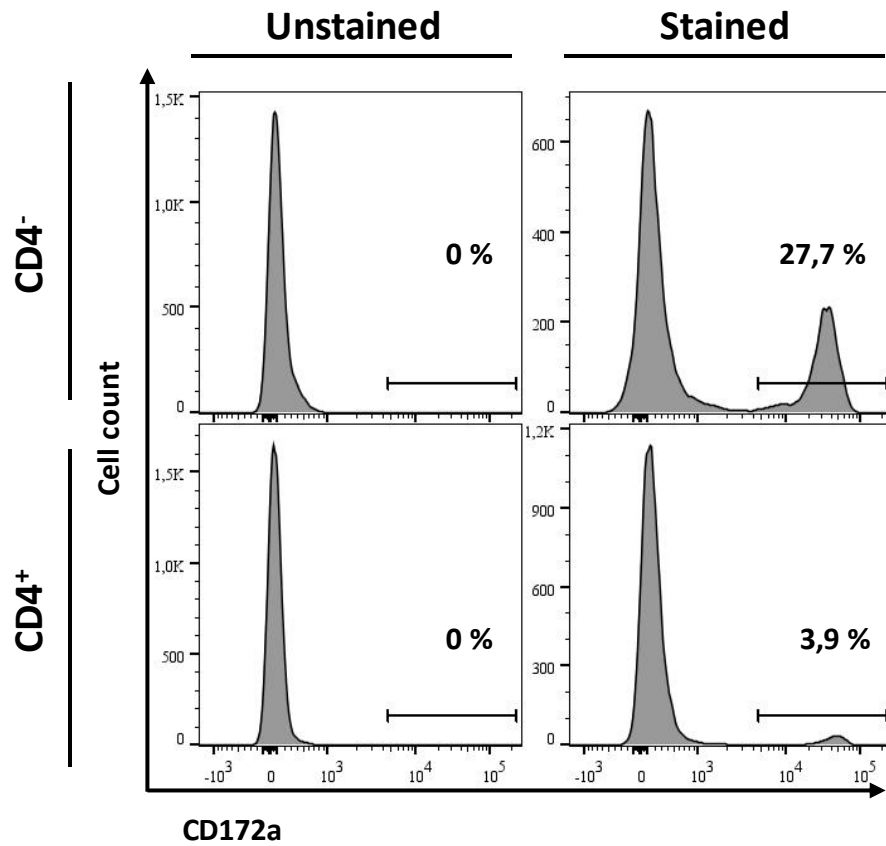

**Supplementary Figure 1.** The CD4<sup>+</sup> fraction contains APCs: Flow cytometry analysis was performed to determine the expression of CD172a, a marker of porcine APCs, in CD4<sup>+</sup> or CD4<sup>-</sup> fraction from fractioned PBMCs.
